# Supplementary material for: Clinical and Functional Characteristics of the E92K CFTR Gene Variant in the Russian and Turkish Population of People with Cystic Fibrosis
Source: MDPI journal article supplement (doi:10.3390/ijms24076351), 2023-03-28
Supplement: s1 [file s1]

**Table S1.** Characteristics of patients with CF with an intestinal biopsy performed for the ICM method and a FIS assay on intestinal organoids.

| Groups                                                             | Number of patients, age, gender       | Name of the second variant | Nature of the violation | Clinical significance |
|--------------------------------------------------------------------|---------------------------------------|----------------------------|-------------------------|-----------------------|
| E92K/E92K<br>Group 1                                               | 3 ind., 2 m:1 w,<br>5, 8 and 12 y.o.  | E92K                       | severe                  | pathogenic            |
| E92K+class I:<br>E92K /2143delT,<br>E92K/CFTRdel1-11<br>Group 2    | 2 ind., 1m:1w, 7<br>and 5 y.o.        | 2143delT                   | severe                  | pathogenic            |
|                                                                    |                                       | CFTR del1-11               | severe                  | pathogenic            |
| E92K+ F508del<br>Group 3                                           | 3 ind., 1m:2w,<br>3,9 and 11 y.o      | F508del                    | severe                  | pathogenic            |
| E92K+ class IV-V:<br>E92K/L138ins,<br>E92K/3849+10kbC→T<br>Group 4 | 2 ind., 1m:1w, 2<br>and 13 y.o        | L138ins                    | mild                    | pathogenic            |
|                                                                    |                                       | 3849+10kbC→T               | mild                    | pathogenic            |
| F508del/F508del<br>Group V                                         | 3 ind, 1m:2w,<br>12, 12 and 16<br>y.o | F508del                    | severe                  | pathogenic            |
| wt/wt<br>control group                                             | 13 ind /2 ind*                        | -                          | no violations           | healthy               |

\* Note: 13 people were examined using the ICM method and 2 using FIS assay on the intestinal organoids.

**Table S2.** The AUC data for FIS measurements

|                           | 0,128 $\mu$ M forskolin |        |                    |        |                    |        |                               |        |
|---------------------------|-------------------------|--------|--------------------|--------|--------------------|--------|-------------------------------|--------|
|                           | forskolin               |        | forskolin + VX-770 |        | forskolin + VX-809 |        | forskolin +<br>VX-770 +VX-809 |        |
|                           | mean                    | sd     | mean               | sd     | mean               | sd     | mean                          | sd     |
| E92K/L138ins              | 21,79                   | 136,55 | 818,76             | 177,62 | 2181,67            | 263,00 | 3416,45                       | 373,74 |
| E92K/3849+10kbC--<br>>T   | -257,32                 | 56,16  | 329,13             | 116,56 | 21,19              | 68,99  | 2312,50                       | 71,35  |
| E92K/F508del<br>patient 3 | 132,06                  | 135,41 | -156,10            | 205,17 | 374,39             | 242,89 | 2588,68                       | 607,58 |
| E92K/F508del<br>patient 2 | -20,34                  | 32,69  | 270,66             | 11,27  | 2630,92            | 54,74  | 3416,92                       | 49,02  |
| E92K/F508del<br>patient 1 | -161,27                 | 40,88  | 89,74              | 14,01  | 1540,21            | 33,11  | 3299,00                       | 32,08  |
| E92K/ CFTRdel 1-11        | -75,30                  | 85,92  | -144,43            | 50,92  | -73,28             | 77,08  | 1373,67                       | 25,54  |
| E92K/2143delT             | -78,58                  | 80,05  | -58,33             | 77,09  | 774,67             | 48,64  | 2588,28                       | 36,32  |
| E92K/E92K patient<br>3    | -214,36                 | 157,36 | 136,04             | 33,99  | 1928,41            | 23,91  | 3754,41                       | 37,16  |
| E92K/E92K patient<br>2    | 2,30                    | 54,58  | 45,47              | 105,11 | 2002,80            | 52,97  | 2336,47                       | 42,52  |
| E92K/E92K patient<br>1    | -162,66                 | 166,74 | 32,27              | 115,65 | 1648,12            | 30,06  | 3838,65                       | 24,72  |
|                           | 5 $\mu$ M forskolin     |        |                    |        |                    |        |                               |        |
| E92K/L138ins              | 1938,22                 | 298,32 | 2492,72            | 108,29 | 5041,99            | 609,65 | 4136,74                       | 574,48 |

|                        |         |        |         |        |         |        |         |        |
|------------------------|---------|--------|---------|--------|---------|--------|---------|--------|
| E92K/3849+10kbC-->T    | 468,36  | 143,24 | 1142,03 | 220,99 | 2971,89 | 131,80 | 3226,94 | 88,38  |
| E92K/F508del patient 3 | 236,20  | 66,20  | 469,63  | 144,00 | 5018,25 | 577,47 | 5515,72 | 699,85 |
| E92K/F508del patient 2 | -46,84  | 73,53  | 523,50  | 15,60  | 3756,37 | 95,05  | 4165,95 | 27,57  |
| E92K/F508del patient 1 | -174,99 | 95,52  | 87,99   | 59,24  | 2418,96 | 20,23  | 3855,71 | 74,39  |
| E92K/ CFTRdel 1-11     | -56,51  | -56,51 | 52,62   | 48,80  | 1921,20 | 43,51  | 3127,24 | 68,93  |
| E92K/2143delT          | -347,17 | 109,34 | -7,34   | 44,73  | 2261,42 | 63,37  | 3343,75 | 48,20  |
| E92K/E92K patient 3    | -25,99  | 125,94 | 212,95  | 28,58  | 3384,59 | 39,10  | 4469,15 | 74,71  |
| E92K/E92K patient 2    | -154,63 | 244,65 | 884,24  | 24,59  | 2455,45 | 71,80  | 3681,70 | 16,23  |
| E92K/E92K patient 1    | 151,82  | 51,93  | 504,89  | 16,08  | 3531,16 | 33,39  | 4111,87 | 32,06  |
| F508del/F508del        | -67,98  | 187,85 | 448,59  | 169,24 | 647,68  | 325,01 | 1928,91 | 126,50 |
